# Supplementary material
Source: PubMed Central journal article supplement (PMC6813806)
Supplement: NIHMS1054685-supplement-Supporting_Information.pdf [file NIHMS1054685-supplement-Supporting_Information.pdf]

1 *Supporting Information*

2 **Tuning Pharmacokinetics to Improve Tumor Accumulation of a PSMA-**  
3 **Targeted Phototheranostic Agent**

4 Kara M. Harmatys<sup>1,4,†</sup>, Marta Overchuk<sup>1,2,†</sup>, Juan Chen<sup>1</sup>, Lili Ding<sup>1</sup>, Ying Chen<sup>3</sup>, Martin G.  
5 Pomper<sup>3</sup>, Gang Zheng<sup>\*,1-2,4</sup>

6

7 <sup>1</sup>Princess Margaret Cancer Centre, University Health Network, 101 College Street,  
8 Toronto, Ontario M5G 1L7, Canada.

9 <sup>2</sup>Institute of Biomaterials and Biomedical Engineering, University of Toronto, 164  
10 College Street, Toronto, Ontario M5S 3G9, Canada

11 <sup>3</sup>Johns Hopkins Medical School, 1550 Orleans Street, 492 CRB II, Baltimore, MD 21287, United  
12 States

13 <sup>4</sup>Department of Medical Biophysics, University of Toronto, 101 College Street, Toronto,  
14 Ontario M5G 1L7, Canada

15 <sup>†</sup> First two authors contributed equally to this work.

16 \*Corresponding Author:

17 Dr. Gang Zheng, University of Toronto, TMDT 5-354, 101 College Street, Toronto, ON,  
18 M5G 1L7, Canada, E-mail: [gang.zheng@uhnres.utoronto.ca](mailto:gang.zheng@uhnres.utoronto.ca)

19 **Supporting Information Contents:**

20 **Figure S1.** Chemical characterization of Pyro-peptide, LC-Pyro and SC-Pyro.

21 **Figure S2.** Flow cytometry quantification of time-dependent LC-Pyro uptake in PSMA+ PC3  
22 PIP and PSMA- PC3 flu cell lines.

23 **Figure S3.** Representative whole-body fluorescence images and *ex vivo* biodistribution of LC-  
24 Pyro (absent PSMA).

25 **Figure S4.** Representative whole-body fluorescence images of mouse injected with SC-Pyro and  
26 imaged at 0, 15 min, 30 min, 1 h, 6 h and 24 h.

27 **Figure S5.** Fluorescence *ex vivo* biodistribution of LC-FITC.

28 **Figure S6.** PET/CT image of <sup>64</sup>Cu-labeled LC-Pyro accumulation in mice bearing an orthotopic  
29 PSMA+ PC3 PIP or PSMA- PC3 flu prostate tumor.

30 **Table S1.** <sup>64</sup>Cu-LC-Pyro biodistribution quantified by gamma counting.

31 **Figure S7.** Representative haemotoxylin and eosin stained sections of major organs 24 h post-  
32 PDT treatment.

33 **Figure S8.** Immunohistochemical validation of PSMA expression in PSMA+ PC3 PIP tumors  
34 post-PDT treatment.

35 **Figure S9.** Blood clearance profile of YC-9.

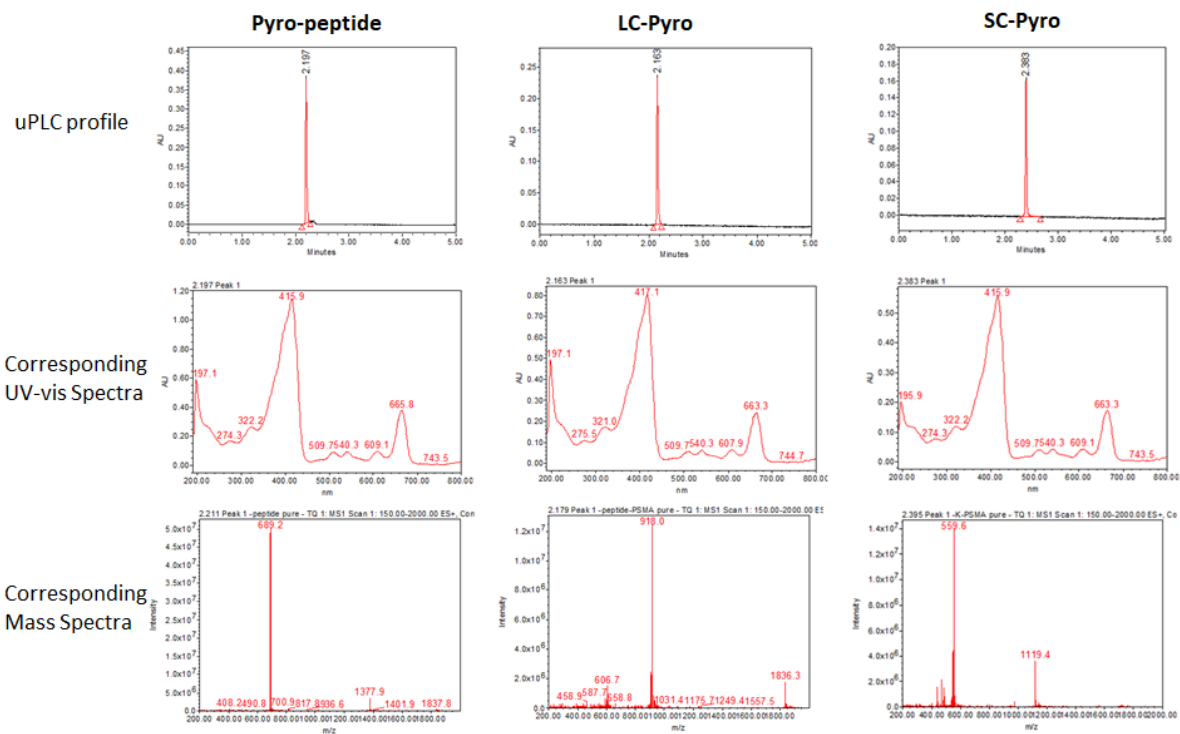

36

37 **Figure S1.** Chemical characterization of Pyro-peptide, LC-Pyro and SC-Pyro; uPLC retention  
 38 profile (Top); Corresponding UV-vis absorbance spectra (Middle) and mass spectra (Bottom).

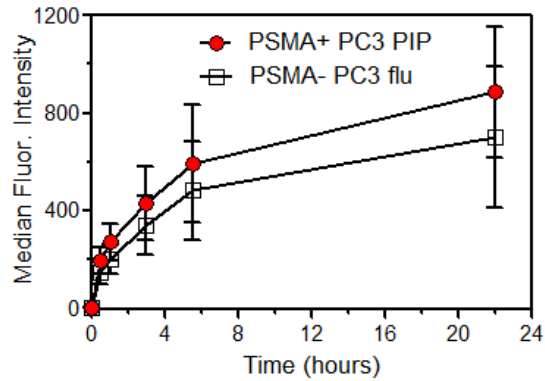

39

40 **Figure S2.** Flow cytometry time-dependent LC-Pyro uptake in PSMA+ PC3 PIP and PSMA-  
 41 PC3 flu cell lines. Each point represents the median fluorescence intensity  $\pm$  the SD of three  
 42 independent measurements.

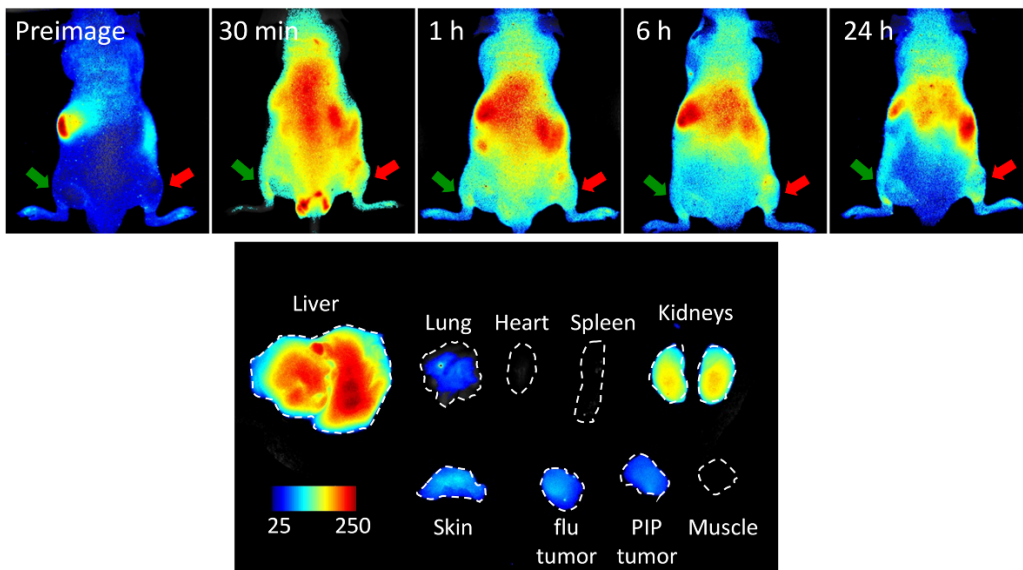

43

44 **Figure S3.** Representative fluorescence images of a mouse bearing dual PSMA+ PC3 PIP (red  
 45 arrow) and PSMA- PC3 flu (green arrow) tumors that were intravenously injected with an LC-  
 46 Pyro derivative unconjugated to the PSMA small molecule affinity ligand (20 nmol). Mice were  
 47 imaged at 0, 30 min, 1 h, 6 h and 24 h post-intravenous injection and major organs were excised  
 48 and imaged *ex vivo*; n = 3.

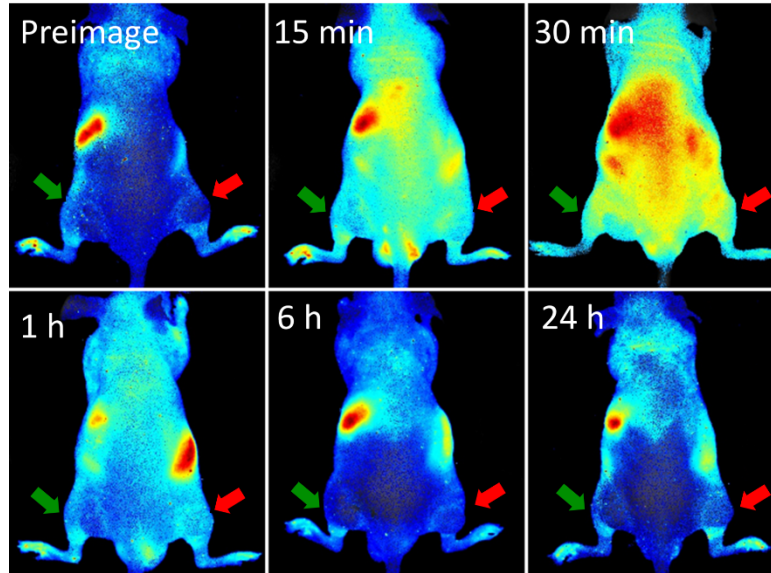

49

50 **Figure S4.** Representative fluorescence images of a mouse bearing dual PSMA+ PC3 PIP (red  
 51 arrow) and PSMA- PC3 flu (green arrow) tumors that were intravenously injected with SC-Pyro  
 52 (20 nmol) at 0, 15 min, 30 min, 1 h, 6 h and 24 h post-injection; n = 3.

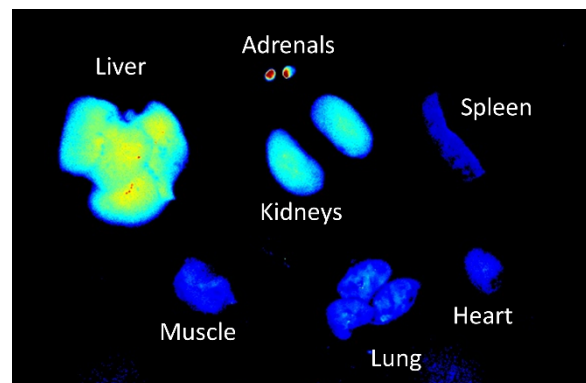

53

54 **Figure S5.** Fluorescence *ex vivo* biodistribution of major clearance organs in a mouse injected  
 55 with LC-FITC 24 h post-injection.

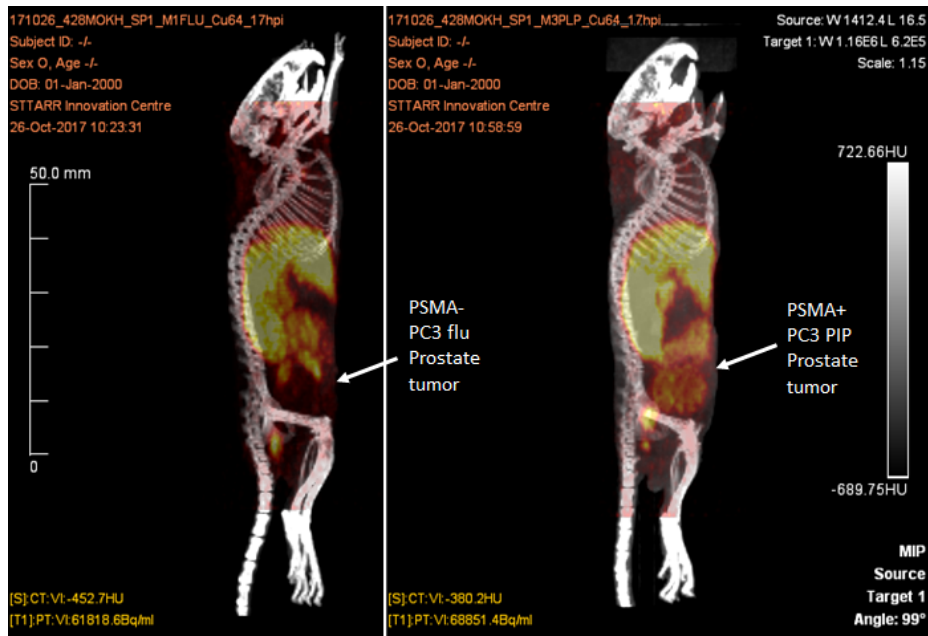

56

57 **Figure S6.** Lateral view PET/CT images of mice bearing either a PSMA- PC3 flu (left) or

58 PSMA+ PC3 PIP (right) orthotopic prostate tumor 17 h post-injection of  $^{64}\text{Cu}$ -LC-Pyro.

| Organ        | PSMA- PC3 flu | PSMA+ PC3 PIP |
|--------------|---------------|---------------|
| Liver        | 18.11 ± 4.43  | 16.61 ± 3.39  |
| Kidney       | 21.52 ± 1.27  | 22.68 ± 3.38  |
| Lung         | 3.81 ± 1.98   | 3.47 ± 0.76   |
| Heart        | 2.00 ± 0.83   | 1.99 ± 0.45   |
| Spleen       | 6.85 ± 2.93   | 8.68 ± 2.10   |
| Adrenals     | 9.55 ± 0.65   | 7.36 ± 2.38   |
| Blood        | 1.74 ± 0.03   | 2.35 ± 0.92   |
| Bladder      | 2.60 ± 1.00   | 5.45 ± 2.51   |
| Urine        | 1.92 ± 0.71   | 2.00 ± 0.92   |
| Brain        | 0.16 ± 0.02   | 0.18 ± 0.03   |
| Muscle       | 1.13 ± 0.98   | 0.98 ± 0.77   |
| Stomach      | 3.25 ± 0.63   | 2.85 ± 0.22   |
| Skin         | 3.81 ± 2.18   | 2.38 ± 0.69   |
| Fat          | 2.32 ± 1.88   | 1.49 ± 1.12   |
| S. Intestine | 4.33 ± 2.08   | 4.70 ± 1.39   |
| L. Intestine | 4.44 ± 1.69   | 4.84 ± 1.96   |
| Tumor        | 2.30 ± 0.09   | 9.74 ± 2.26   |
| Prostate     | 3.38 ± 1.22   | 4.14 ± 0.53   |
| Sem. Ves.    | 1.09 ± 0.53   | 1.16 ± 0.47   |
| Testes       | 1.59 ± 0.57   | 1.66 ± 0.26   |
| Feces        | 14.35 ± 5.79  | 21.74 ± 8.96  |

59

60 **Table S1.** Corresponding <sup>64</sup>Cu-LC-Pyro biodistribution from **Figure 5** of main organs and  
61 PSMA- PC3 flu and PSMA+ PC3 PIP tumors quantified via gamma counting (n = 4 for PSMA+  
62 PC3 PIP; n = 3 for PSMA- PC3 flu, \*\**P* < 0.01; \*\*\**P* < 0.001). Data is represented as mean ±  
63 SD.

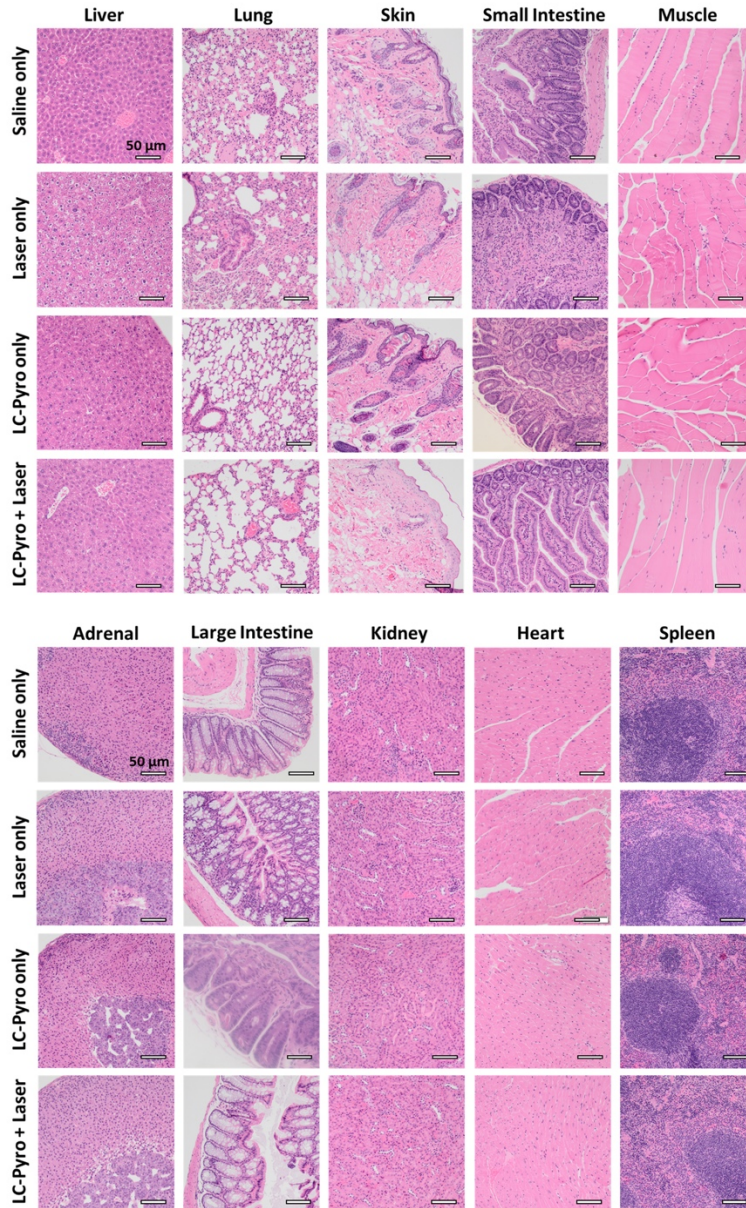

64

65 **Figure S7.** H&E evaluation of organ toxicity 24 h post-treatment from each cohort; 1) Saline  
 66 only; 2) Laser only; 3) LC-Pyro only and 4) LC-Pyro + Laser. Organs include the liver, lung,  
 67 skin, small intestine, muscle, adrenal, large intestine, kidney, heart and spleen. Histological  
 68 slices reveal no adverse side effects on healthy tissues after treatment. Scale = 50 μm.



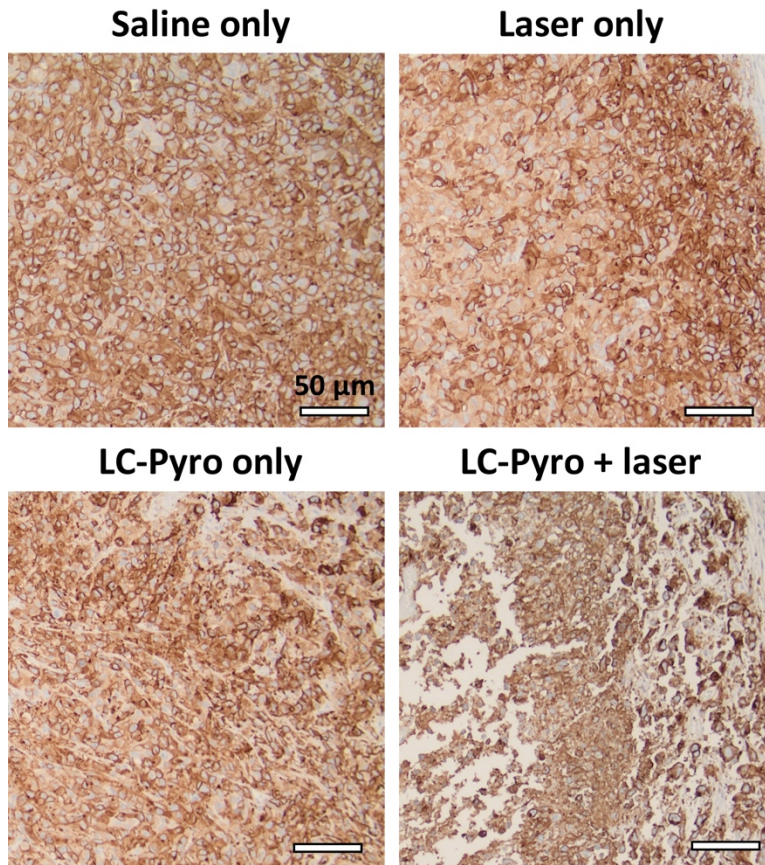

69

70 **Figure S8.** Representative PSMA staining sections of PSMA+ PC3 PIP tumors post-PDT  
71 treatment from each cohort; 1) Saline only; 2) Laser only; 3) LC-Pyro only and 4) LC-Pyro +  
72 Laser. Scale = 50 μm. PDT did not significantly alter expression of PSMA.

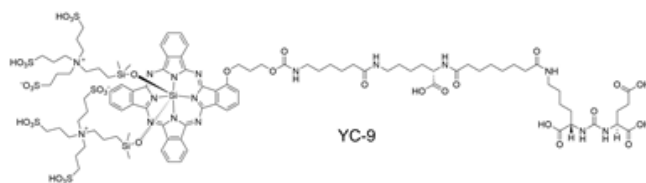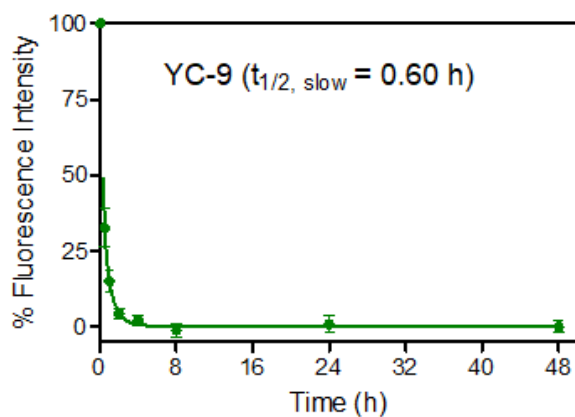

73

74 **Figure S9.** Chemical structure of reported compound YC-9<sup>1</sup> and its plasma blood clearance  
 75 profile in BALB/c mice (n = 5). The profile fits into a two-compartment model with a slow half-  
 76 life of 0.60 h.

77

78 **References:**

79 1. Chen, Y.; Chatterjee, S.; Lisok, A.; Minn, I.; Pullambhatla, M.; Wharram, B.; Wang, Y.;  
 80 Jin, J.; Bhujwalla, Z. M.; Nimmagadda, S.; Mease, R. C.; Pomper, M. G., A PSMA-targeted  
 81 theranostic agent for photodynamic therapy. *J Photochem Photobiol B* **2017**, *167*, 111-116.  
 82
